# Supplementary material
Source: PubMed Central journal article supplement (PMC7883550)
Supplement: pkaa123_supplementary_data.pdf [file pkaa123_supplementary_data.pdf]

**Supplementary Table 1.** Individual PROMIS Global Health measures and scores

| <b>Please respond to each item by marking one box per row</b>                                                                                          | <b>Excellent</b>  | <b>Very Good</b> | <b>Good</b>       | <b>Fair</b>     | <b>Poor</b>        |   |   |   |   |   |            |
|--------------------------------------------------------------------------------------------------------------------------------------------------------|-------------------|------------------|-------------------|-----------------|--------------------|---|---|---|---|---|------------|
| 1. In general, would you say your quality of life is:                                                                                                  | 5                 | 4                | 3                 | 2               | 1                  |   |   |   |   |   |            |
| 2. In general, how would you rate your physical health?                                                                                                | 5                 | 4                | 3                 | 2               | 1                  |   |   |   |   |   |            |
| 3. In general, how would you rate your mental health, including your mood and your ability to think?                                                   | 5                 | 4                | 3                 | 2               | 1                  |   |   |   |   |   |            |
| 4. In general, how would you rate your satisfaction with your social activities and relationships?                                                     | 5                 | 4                | 3                 | 2               | 1                  |   |   |   |   |   |            |
|                                                                                                                                                        | <b>Completely</b> | <b>Mostly</b>    | <b>Moderately</b> | <b>A Little</b> | <b>Not At All</b>  |   |   |   |   |   |            |
| 5. To what extent are you able to carry out your everyday physical activities such as walking, climbing stairs, carrying groceries, or moving a chair? | 5                 | 4                | 3                 | 2               | 1                  |   |   |   |   |   |            |
| <b>In the past 7 days</b>                                                                                                                              | <b>Never</b>      | <b>Rarely</b>    | <b>Sometimes</b>  | <b>Often</b>    | <b>Always</b>      |   |   |   |   |   |            |
| 6. How often have you been bothered by emotional problems such as feeling anxious, depressed or irritable?                                             | 5                 | 4                | 3                 | 2               | 1                  |   |   |   |   |   |            |
|                                                                                                                                                        | <b>None</b>       | <b>Mild</b>      | <b>Moderately</b> | <b>Severe</b>   | <b>Very Severe</b> |   |   |   |   |   |            |
| 7. How would you rate your fatigue on average?                                                                                                         | 5                 | 4                | 3                 | 2               | 1                  |   |   |   |   |   |            |
| 8. How would you rate your pain on average?                                                                                                            | 0                 | 1                | 2                 | 3               | 4                  | 5 | 6 | 7 | 8 | 9 | 10         |
|                                                                                                                                                        | No                |                  |                   |                 |                    |   |   |   |   |   | Worst      |
|                                                                                                                                                        | Pain              |                  |                   |                 |                    |   |   |   |   |   | Imaginable |
|                                                                                                                                                        |                   |                  |                   |                 |                    |   |   |   |   |   | Pain       |

Re-scoring the pain question as: score 5 for response 0 No pain; score 4 for responses 1, 2 or 3; score 3 for responses 4, 5 or 6; score 2 for responses 7, 8 or 9; score 1 for response 10 worst pain imaginable.

Global Physical Health (GPH) raw score= Sum response scores from questions 2, 5, 7 and 8.

Global Mental Health (GMH) raw score= Sum response scores from questions 1, 3, 4 and 6.

Adapted from The Ohio State University Kemper-Gascon Global Health and Well-being Patient-Completed Health Outcome Measures. <https://www.scribd.com/document/342845011/All-Complete-Promis-10-Promis-29-Well-being-Measures-20114-4-29kk-1>

**Supplementary Table 2.** PROMIS Global Health raw score to T score conversion

| Raw Score | GPH T score | GMH T score |
|-----------|-------------|-------------|
| 4         | 16.2        | 21.2        |
| 5         | 19.9        | 25.1        |
| 6         | 23.5        | 28.4        |
| 7         | 26.7        | 31.3        |
| 8         | 29.6        | 33.8        |
| 9         | 32.4        | 36.3        |
| 10        | 34.9        | 38.8        |
| 11        | 37.4        | 41.1        |
| 12        | 39.8        | 43.5        |
| 13        | 42.3        | 45.8        |
| 14        | 44.9        | 48.3        |
| 15        | 47.7        | 50.8        |
| 16        | 50.8        | 53.3        |
| 17        | 54.1        | 56.0        |
| 18        | 57.7        | 59.0        |
| 19        | 61.9        | 62.5        |
| 20        | 67.7        | 67.6        |

Adapted from The PROMIS Global Health Scoring Manual.

[https://www.healthmeasures.net/images/PROMIS/manuals/PROMIS\\_Global\\_Scoring\\_Manual.pdf](https://www.healthmeasures.net/images/PROMIS/manuals/PROMIS_Global_Scoring_Manual.pdf)

**Supplementary Table 3.** Factors associated with pain and fatigue among cancer survivors, Medical Expenditure Panel Survey 2016

| Characteristic                                    | Pain               |         |                    |         | Fatigue            |         |                    |         |  |
|---------------------------------------------------|--------------------|---------|--------------------|---------|--------------------|---------|--------------------|---------|--|
|                                                   | Bivariate model    |         | Multivariate model |         | Bivariate model    |         | Multivariate model |         |  |
|                                                   | OR (95CI)          | P-value |  |
| <i>Sociodemographic factors</i>                   |                    |         |                    |         |                    |         |                    |         |  |
| <b>Age group</b>                                  |                    |         |                    |         |                    |         |                    |         |  |
| 18-54                                             | ref                |         | ref                |         | ref                |         | ref                |         |  |
| 55-64                                             | 0.83 (0.50, 1.36)  | 0.45    | 0.85 (0.48, 1.52)  | 0.58    | 0.70 (0.43, 1.14)  | 0.15    | 0.62 (0.35, 1.10)  | 0.10    |  |
| 65-74                                             | 0.72 (0.46, 1.12)  | 0.14    | 0.52 (0.29, 0.94)  | 0.03    | 0.88 (0.56, 1.37)  | 0.56    | 0.58 (0.31, 1.06)  | 0.08    |  |
| ≥ 75                                              | 0.88 (0.54, 1.43)  | 0.61    | 0.59 (0.30, 1.14)  | 0.12    | 0.88 (0.56, 1.38)  | 0.57    | 0.50 (0.28, 0.90)  | 0.02    |  |
| <b>Sex</b>                                        |                    |         |                    |         |                    |         |                    |         |  |
| Male                                              | ref                |         |                    |         | ref                |         |                    |         |  |
| Female                                            | 1.23 (0.87, 1.74)  | 0.24    | --                 | --      | 1.20 (0.87, 1.66)  | 0.27    | --                 | --      |  |
| <b>Race / ethnicity</b>                           |                    |         |                    |         |                    |         |                    |         |  |
| Non-Hispanic white only                           | ref                |         | ref                |         | ref                |         | ref                |         |  |
| All other race/ethnicities                        | 1.61 (1.12, 2.33)  | 0.01    | 1.56 (1.04, 2.35)  | 0.03    | 1.18 (0.83, 1.69)  | 0.36    | 1.13 (0.75, 1.70)  | 0.57    |  |
| <b>Current marital status</b>                     |                    |         |                    |         |                    |         |                    |         |  |
| Married                                           | ref                |         | ref                |         | ref                |         | ref                |         |  |
| Not married <sup>a</sup>                          | 1.62 (1.17, 2.24)  | 0.004   | 0.94 (0.64, 1.38)  | 0.75    | 1.44 (1.06, 1.95)  | 0.02    | 0.96 (0.65, 1.41)  | 0.83    |  |
| <b>Education attainment</b>                       |                    |         |                    |         |                    |         |                    |         |  |
| Less than high school graduate                    | ref                |         | ref                |         | ref                |         | ref                |         |  |
| High school graduate                              | 0.50 (0.30, 0.84)  | 0.009   | 0.74 (0.41, 1.34)  | 0.32    | 0.80 (0.48, 1.33)  | 0.38    | 1.15 (0.63, 2.08)  | 0.64    |  |
| Some college or more                              | 0.38 (0.25, 0.60)  | <.001   | 0.84 (0.49, 1.44)  | 0.53    | 0.48 (0.30, 0.76)  | 0.002   | 1.00 (0.58, 1.72)  | 1.00    |  |
| <b>Family income as percent of poverty line</b>   |                    |         |                    |         |                    |         |                    |         |  |
| Low-income ≤138%                                  | ref                |         | ref                |         | ref                |         | ref                |         |  |
| Middle-income 139-400%                            | 0.58 (0.37, 0.91)  | 0.02    | 0.72 (0.44, 1.19)  | 0.20    | 0.86 (0.57, 1.29)  | 0.46    | 0.98 (0.62, 1.56)  | 0.93    |  |
| High-income >400%                                 | 0.23 (0.15, 0.36)  | <.001   | 0.40 (0.23, 0.69)  | 0.001   | 0.41 (0.27, 0.61)  | <.001   | 0.61 (0.37, 1.02)  | 0.06    |  |
| <b>Health insurance coverage <sup>b</sup></b>     |                    |         |                    |         |                    |         |                    |         |  |
| Any private                                       | ref                |         | ref                |         | ref                |         | ref                |         |  |
| Public only                                       | 2.20 (1.51, 3.22)  | <.001   | 1.36 (0.88, 2.10)  | 0.17    | 2.11 (1.49, 2.98)  | <.001   | 1.42 (0.92, 2.20)  | 0.12    |  |
| <b>Employment status</b>                          |                    |         |                    |         |                    |         |                    |         |  |
| Employed                                          | ref                |         |                    |         | ref                |         |                    |         |  |
| Retired                                           | 1.78 (1.11, 2.83)  | 0.02    | --                 | --      | 1.69 (1.16, 2.46)  | 0.007   | --                 | --      |  |
| Unable to work because ill/disabled               | 7.71 (4.42, 13.45) | <.001   | --                 | --      | 8.42 (5.03, 14.09) | <.001   | --                 | --      |  |
| Not working for other reasons                     | 3.70 (2.09, 6.55)  | <.001   | --                 | --      | 2.49 (1.45, 4.26)  | 0.001   | --                 | --      |  |
| <i>Clinical factors</i>                           |                    |         |                    |         |                    |         |                    |         |  |
| <b>Number of comorbid conditions <sup>c</sup></b> |                    |         |                    |         |                    |         |                    |         |  |
| 0                                                 | ref                |         | ref                |         | ref                |         | ref                |         |  |
| 1                                                 | 1.28 (0.54, 3.04)  | 0.58    | 1.36 (0.60, 3.11)  | 0.46    | 1.21 (0.56, 2.62)  | 0.63    | 1.46 (0.72, 2.98)  | 0.29    |  |
| 2                                                 | 2.17 (0.91, 5.18)  | 0.08    | 2.65 (1.17, 6.00)  | 0.02    | 1.93 (0.88, 4.26)  | 0.10    | 2.59 (1.24, 5.37)  | 0.01    |  |
| 3                                                 | 2.22 (1.004, 4.89) | 0.049   | 2.43 (1.17, 5.05)  | 0.02    | 2.49 (1.19, 5.18)  | 0.02    | 2.91 (1.49, 5.71)  | <.001   |  |

|                                                          |                    |       |                    |       |                   |       |                    |       |  |
|----------------------------------------------------------|--------------------|-------|--------------------|-------|-------------------|-------|--------------------|-------|--|
| 4                                                        | 4.74 (2.14, 10.47) | <.001 | 4.60 (2.10, 10.05) | <.001 | 4.85 (2.44, 9.64) | <.001 | 5.30 (2.69, 10.55) | <.001 |  |
| <b>Comorbid condition <sup>c</sup></b>                   |                    |       |                    |       |                   |       |                    |       |  |
| Arthritis                                                | 2.77 (1.93, 3.97)  | <.001 | --                 | --    | 1.85 (1.32, 2.59) | <.001 | --                 | --    |  |
| Asthma                                                   | 2.24 (1.41, 3.56)  | <.001 | --                 | --    | 2.27 (1.39, 3.71) | 0.001 | --                 | --    |  |
| Diabetes                                                 | 2.22 (1.42, 3.49)  | <.001 | --                 | --    | 2.83 (1.91, 4.20) | <.001 | --                 | --    |  |
| Emphysema                                                | 2.39 (1.31, 4.36)  | 0.005 | --                 | --    | 1.86 (1.02, 3.38) | 0.04  | --                 | --    |  |
| Heart disease                                            | 1.47 (1.06, 2.04)  | 0.02  | --                 | --    | 1.99 (1.46, 2.72) | <.001 | --                 | --    |  |
| High cholesterol                                         | 1.48 (1.07, 2.05)  | 0.02  | --                 | --    | 1.34 (0.97, 1.84) | 0.07  | --                 | --    |  |
| Hypertension                                             | 1.70 (1.19, 2.43)  | 0.004 | --                 | --    | 2.18 (1.56, 3.06) | <.001 | --                 | --    |  |
| Stroke                                                   | 2.25 (1.47, 3.45)  | <.001 | --                 | --    | 2.04 (1.23, 3.40) | 0.006 | --                 | --    |  |
| <b>Cancer type</b>                                       |                    |       |                    |       |                   |       |                    |       |  |
| Female breast only                                       | ref                |       | ref                |       | ref               |       | ref                |       |  |
| Prostate only                                            | 0.92 (0.52, 1.60)  | 0.75  | 0.89 (0.49, 1.64)  | 0.72  | 0.63 (0.39, 1.02) | 0.06  | 0.64 (0.37, 1.10)  | 0.11  |  |
| Female other                                             | 1.62 (1.01, 2.60)  | 0.04  | 1.22 (0.69, 2.16)  | 0.50  | 1.18 (0.78, 1.79) | 0.44  | 0.89 (0.55, 1.45)  | 0.65  |  |
| Male other                                               | 1.23 (0.71, 2.11)  | 0.46  | 1.23 (0.65, 2.30)  | 0.52  | 1.14 (0.70, 1.84) | 0.61  | 1.07 (0.62, 1.85)  | 0.81  |  |
| <b>Years since last cancer treatment</b>                 |                    |       |                    |       |                   |       |                    |       |  |
| <1                                                       | ref                |       | ref                |       | ref               |       | ref                |       |  |
| 1 to <5                                                  | 0.91 (0.53, 1.56)  | 0.74  | 1.02 (0.55, 1.87)  | 0.97  | 1.03 (0.61, 1.75) | 0.91  | 1.18 (0.64, 2.16)  | 0.59  |  |
| ≥5                                                       | 0.60 (0.38, 0.93)  | 0.02  | 0.61 (0.38, 0.97)  | 0.04  | 0.47 (0.31, 0.71) | <.001 | 0.49 (0.32, 0.75)  | 0.001 |  |
| Never treated / missing                                  | 0.95 (0.52, 1.75)  | 0.87  | 0.85 (0.44, 1.66)  | 0.64  | 0.40 (0.22, 0.73) | 0.003 | 0.35 (0.18, 0.67)  | 0.002 |  |
| <i>Lifestyle factors</i>                                 |                    |       |                    |       |                   |       |                    |       |  |
| <b>Body mass index (kg/m<sup>2</sup>)</b>                |                    |       |                    |       |                   |       |                    |       |  |
| 18.5 to 24.9                                             | ref                |       | ref                |       | ref               |       | ref                |       |  |
| 25 to 29.9                                               | 0.88 (0.56, 1.34)  | 0.57  | 0.88 (0.52, 1.48)  | 0.62  | 1.09 (0.73, 1.62) | 0.69  | 1.07 (0.67, 1.72)  | 0.79  |  |
| ≥30                                                      | 2.10 (1.38, 3.22)  | <.001 | 1.59 (0.97, 2.61)  | 0.07  | 2.24 (1.48, 3.40) | <.001 | 1.59 (0.99, 2.56)  | 0.06  |  |
| <b>Meeting physical activity guidelines <sup>d</sup></b> |                    |       |                    |       |                   |       |                    |       |  |
| Yes                                                      | ref                |       | ref                |       | ref               |       | ref                |       |  |
| No/unknown                                               | 2.08 (1.44, 3.01)  | <.001 | 1.42 (0.93, 2.15)  | 0.10  | 2.87 (1.95, 4.22) | <.001 | 2.13 (1.37, 3.30)  | <.001 |  |
| <b>Current smoker</b>                                    |                    |       |                    |       |                   |       |                    |       |  |
| No/unknown                                               | ref                |       | ref                |       | ref               |       | ref                |       |  |
| Yes                                                      | 2.17 (1.27, 3.74)  | 0.005 | 1.47 (0.79, 2.72)  | 0.23  | 2.25 (1.28, 3.97) | 0.005 | 1.39 (0.73, 2.63)  | 0.31  |  |

Abbreviations: OR: odd ratio; 95CI: 95% confidence interval.

Logistic regression models were fitted for pain (scored 4 or more on the 10-point scale) and fatigue (rated moderate, severe or very severe vs. mild or none). In multivariable models, sex and cancer type were combined into one variable, employment status was excluded due to high collinearity with age, and number of comorbid conditions and exact comorbid conditions were included in models alternatively. "--" indicates inapplicable as the variable was not included in the multivariable models.

a Not married includes widowed, divorced, separated, or never married.

b Public insurance includes Medicare, Medicaid, and/or other public hospital/physician coverage. TRICARE/CHAMPVA was treated as private coverage, as were employer-based, union-based, and other private insurance.

c Comorbid conditions include arthritis, asthma, diabetes, emphysema, heart disease (angina, coronary heart disease, heart attack, other heart condition/disease), high cholesterol, hypertension, and stroke.

d Meeting physical activity guidelines defined by currently spending half hour or more in moderate to vigorous physical activity at least five times a week.

**Supplementary Table 4.** Adjusted associations of comorbid conditions with pain and fatigue among cancer survivors, Medical Expenditure Panel Survey 2016

| <b>Comorbid conditions</b> | <b>Pain</b>       |                | <b>Fatigue</b>    |                |
|----------------------------|-------------------|----------------|-------------------|----------------|
|                            | <b>OR (95CI)</b>  | <b>P-value</b> | <b>OR (95CI)</b>  | <b>P-value</b> |
| Arthritis                  | 2.59 (1.73, 3.90) | <.001          | 1.58 (1.05, 2.37) | 0.03           |
| Asthma                     | 1.44 (0.83, 2.49) | 0.19           | 1.79 (0.98, 3.26) | 0.06           |
| Diabetes                   | 1.50 (0.90, 2.50) | 0.12           | 1.88 (1.24, 2.83) | 0.003          |
| Emphysema                  | 1.56 (0.77, 3.17) | 0.21           | 1.05 (0.47, 2.32) | 0.91           |
| Heart disease              | 1.05 (0.71, 1.55) | 0.81           | 1.64 (1.09, 2.48) | 0.02           |
| High cholesterol           | 1.14 (0.76, 1.73) | 0.53           | 0.88 (0.58, 1.33) | 0.53           |
| Hypertension               | 1.09 (0.67, 1.78) | 0.73           | 1.64 (1.07, 2.50) | 0.02           |
| Stroke                     | 1.58 (0.94, 2.68) | 0.09           | 1.11 (0.64, 1.91) | 0.71           |

Abbreviations: OR: odd ratio; 95CI: 95% confidence interval.

Multivariable logistic regression models were fitted for pain (scored 4 or more on the 10-point scale) and fatigue (rated moderate, severe or very severe), adjusting for age group, race/ethnicity, current marital status, education, family income, health insurance, cancer type, year since diagnosis, body weight status, meeting physical activity guidelines and current smoking status.

Supplementary Figure 1. Inclusion/exclusion diagram

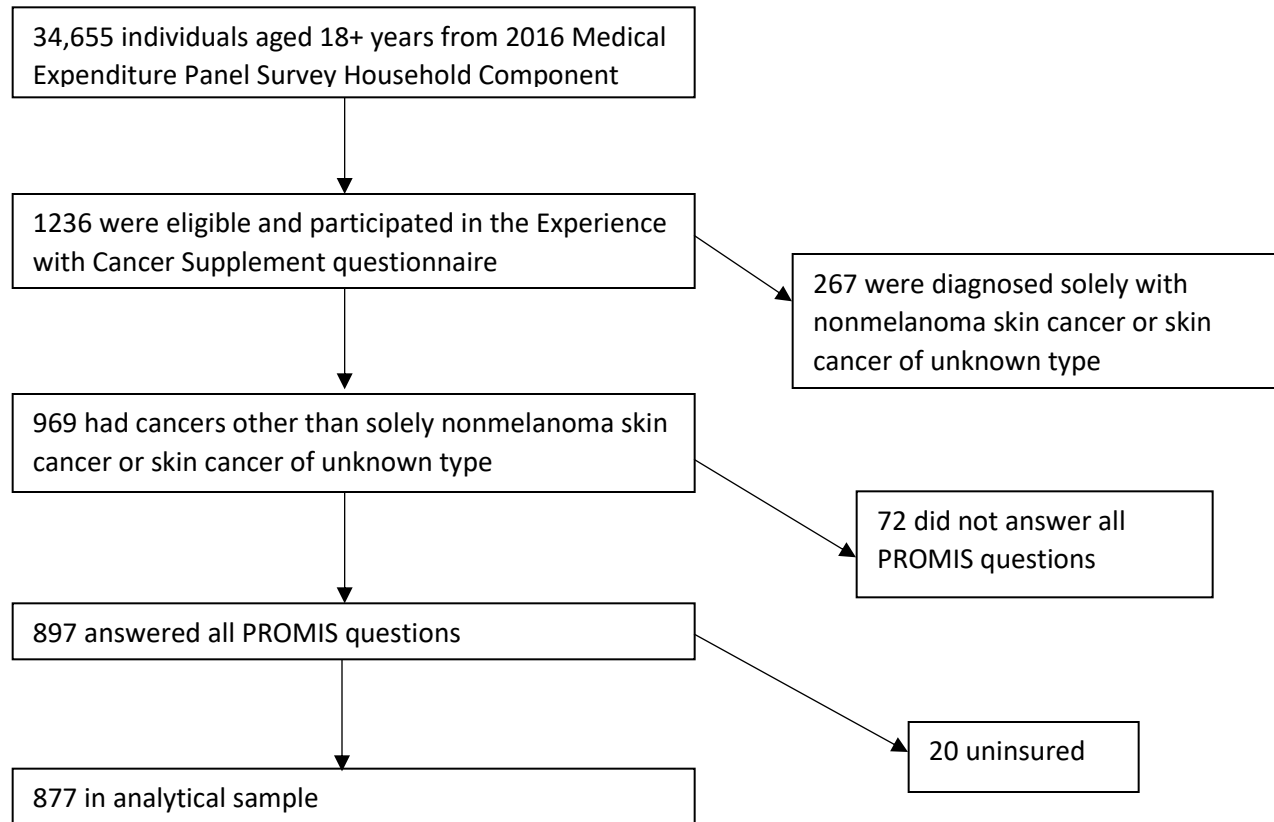

Supplementary Figure 2. Distribution of health-related quality of life measured by PROMIS, Medical Expenditure Panel Survey 2016

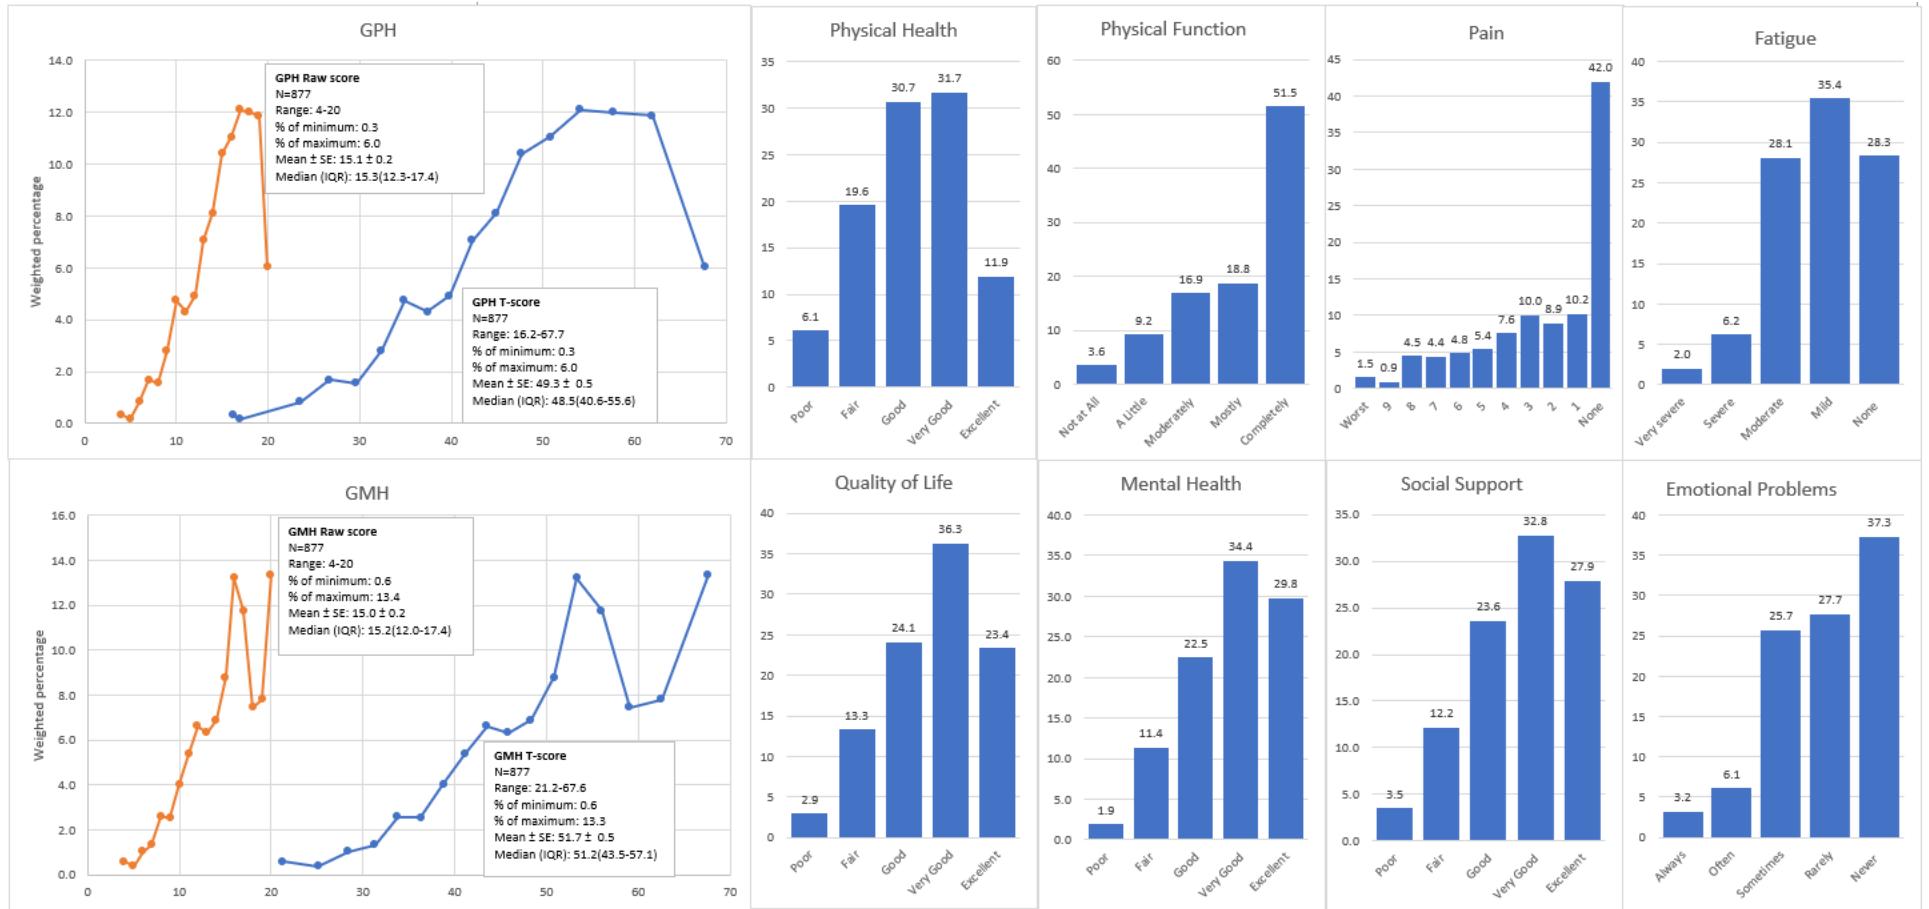

Top row: global physical health summary score and the 4 individual items; bottom row: global mental health summary score and the 4 individual items.
